# Supplementary material for: Isolation of Cysteine-Rich Peptides from Citrullus colocynthis
Source: MDPI journal article supplement (doi:10.3390/biom10091326), 2020-09-16
Supplement: s1 [file s1]

# **Isolation of cysteine-rich peptides from *Citrullus colocynthis***

Behzad Shahin-Kaleybar, Ali Niazi, Alireza Afsharifar, Ghorbanali Nematzadeh, Reza Yousefi,  
Bernhard Retzl, Roland Hellinger, Edin Muratspahić, Christian W. Gruber

## **Supplementary Materials**

**Table S1. Comparison of citcol-8 with CRPs from *Momordica* spp.**

| Gene      | Sequence <sup>1</sup>                      | Uniprot ID | Cys loops pattern                                                                               | Species                          |
|-----------|--------------------------------------------|------------|-------------------------------------------------------------------------------------------------|----------------------------------|
| citcol-8  | --NRVGVCLFVGKPCWSDADCPSGCYCKPLPLIDAGYCGFL  | -          | CX <sub>6</sub> CX <sub>5</sub> CX <sub>3</sub> CX <sub>1</sub> CX <sub>10</sub> C <sup>2</sup> | <i>Citrullus colocynthis</i>     |
| MCoTI-I   | SGSDGGVCPKILQRCRRDSDCPGACICRG-----NGYCG--  | P82408     | CX <sub>6</sub> CX <sub>5</sub> CX <sub>3</sub> CX <sub>1</sub> CX <sub>5</sub> C               | <i>Momordica cochinchinensis</i> |
| MCoTI-II  | SGSDGGVCPKILKKCRRDSDCPGACICRG-----NGYCG--  | P82409     | CX <sub>6</sub> CX <sub>5</sub> CX <sub>3</sub> CX <sub>1</sub> CX <sub>5</sub> C               | <i>Momordica cochinchinensis</i> |
| EETI-II   | -----GCPRIILMRCKQDSDCLAGCVCGP-----NGFCGSP  | P12071     | CX <sub>6</sub> CX <sub>5</sub> CX <sub>3</sub> CX <sub>1</sub> CX <sub>5</sub> C               | <i>Momordica elaterium</i>       |
| MCoTI-III | ----QRACPRIILKKCRRDSDCPGECICKE-----NGYCG-- | P82410     | CX <sub>6</sub> CX <sub>5</sub> CX <sub>3</sub> CX <sub>1</sub> CX <sub>5</sub> C               | <i>Momordica cochinchinensis</i> |

<sup>1</sup>cysteine residues are highlighted in yellow; <sup>2</sup>X represents any amino acid residue except cysteine.

**Figure S1. The m/z value list of the b- and y-ions series for the precursor masses used for *de novo* sequencing of citcol-2.** The m/z value for b/y ions produced in tandem MS for each of the precursor masses have been shown in separate Tables. A, B, C and D correspond to detected b/y ions for 3279.2, 822.4, 1723.8 and 1858.6 m/z precursor masses respectively. All the ion masses have been represented as monoisotopic mass signals [M+H]<sup>+</sup>.

**A**

| #  | b      | Seq. | y      | #(+1) |
|----|--------|------|--------|-------|
| 1  | -      | P    | 3279.2 | 28    |
| 2  | 258.0  | C    | 3182.2 | 27    |
| 3  | -      | W    | 3022.2 | 26    |
| 4  | 531.1  | S    | 2836.1 | 25    |
| 5  | 646.2  | D    | 2749.0 | 24    |
| 6  | -      | A    | 2634.0 | 23    |
| 7  | 832.2  | D    | 2563.0 | 22    |
| 8  | 992.2  | C    | 2447.9 | 21    |
| 9  | -      | P    | 2287.9 | 20    |
| 10 | -      | S    | 2190.9 | 19    |
| 11 | 1233.7 | G    | 2103.9 | 18    |
| 12 | 1393.3 | C    | 2046.8 | 17    |
| 13 | 1556.4 | Y    | 1886.8 | 16    |
| 14 | 1716.4 | C    | 1723.8 | 15    |
| 15 | 1844.5 | K    | 1563.8 | 14    |
| 16 | 1941.6 | P    | 1435.7 | 13    |
| 17 | 2054.7 | L    | -      | 12    |
| 18 | 2151.7 | P    | 1225.5 | 11    |
| 19 | 2264.8 | L    | -      | 10    |
| 20 | 2377.9 | I    | 1015.4 | 9     |
| 21 | 2492.9 | D    | 902.3  | 8     |
| 22 | 2563.9 | A    | 787.3  | 7     |
| 23 | 2621.0 | G    | 716.2  | 6     |
| 24 | 2784.0 | Y    | -      | 5     |
| 25 | 2944.0 | C    | -      | 4     |
| 26 | 3001.1 | G    | -      | 3     |
| 27 | 3148.1 | F    | -      | 2     |
| 28 | 3279.2 | L    | -      | 1     |

**B**

| # | b     | Seq. | y     | #(+1) |
|---|-------|------|-------|-------|
| 1 | -     | V    | 822.4 | 7     |
| 2 | 260.0 | C    | 723.3 | 6     |
| 3 | 373.1 | L    | 563.3 | 5     |
| 4 | 520.2 | F    | 450.2 | 4     |
| 5 | 619.3 | V    | 303.2 | 3     |
| 6 | 676.3 | G    | 204.1 | 2     |
| 7 | 804.4 | K    | -     | 1     |

**C**

| #  | b      | Seq. | y      | #(+1) |
|----|--------|------|--------|-------|
| 1  | -      | C    | 1723.8 | 15    |
| 2  | 289.1  | K    | 1563.8 | 14    |
| 3  | 386.1  | P    | 1435.7 | 13    |
| 4  | 499.2  | L    | 1338.6 | 12    |
| 5  | 596.3  | P    | 1225.5 | 11    |
| 6  | 709.3  | L    | 1128.5 | 10    |
| 7  | 822.4  | I    | 1015.4 | 9     |
| 8  | 937.4  | D    | 902.3  | 8     |
| 9  | 1008.5 | A    | 787.3  | 7     |
| 10 | 1065.5 | G    | 716.2  | 6     |
| 11 | 1228.6 | Y    | 659.2  | 5     |
| 12 | 1388.6 | C    | 496.2  | 4     |
| 13 | 1445.6 | G    | -      | 3     |
| 14 | 1592.7 | F    | -      | 2     |
| 15 | 1705.8 | L    | -      | 1     |

**D**

| #  | b      | Seq. | y      | #(+1) |
|----|--------|------|--------|-------|
| 1  |        | V    | 1858.6 | 16    |
| 2  |        | G    | 1759.5 | 15    |
| 3  | 258.1  | K    | 1702.5 | 14    |
| 4  | 382.2  | P    | 1574.4 | 13    |
| 5  | 542.2  | C    | 1477.4 | 12    |
| 6  | 728.3  | W    | 1317.4 | 11    |
| 7  | 815.3  | S    | 1131.3 | 10    |
| 8  | 930.3  | D    | 1044.2 | 9     |
| 9  | 1001.4 | A    | 929.2  | 8     |
| 10 | 1116.4 | D    | 858.2  | 7     |
| 11 | 1276.4 | C    | 743.2  | 6     |
| 12 | 1373.5 | P    | 583.1  | 5     |
| 13 | 1460.5 | S    |        | 4     |
| 14 | 1517.5 | G    |        | 3     |
| 15 | 1677.5 | C    |        | 2     |
| 16 | 1840.6 | Y    |        | 1     |

**Figure S2. *De novo* sequencing of citcol peptides (citcol-1 to 7) by MALDI-TOF/TOF.** Proteolytic digestion sites and tandem MS fragmentation spectra including observed b- and y-ion series are shown for citcol-1 (A), citcol-2 (B), citcol-3 (C), citcol-4 (D), citcol-5 (E), citcol-6 (F), citcol-7 (G) and citcol-8 (H). The digestion site by each enzyme has been shown by arrow and the produced fragments used as precursor masses have been shown in bracket in monoisotopic masses  $[M+H]^+$ . The amino acid sequence was determined by manually fragments assembly of digested fragments and N-terminal b-ions / C-terminal y-ions series identification. Tryptic digestion was used to distinguish between Isobaric amino acids Gln/Lys and chymotrypsin for Leu/Ile. The m/z value list of each of the precursor masses used for used for *de-novo* sequencing by tandem MS have been shown in tables neXt to spectra. Only digestion sites have been shown for the fragments that were sufficient for sequencing the entire peptide.

**A**

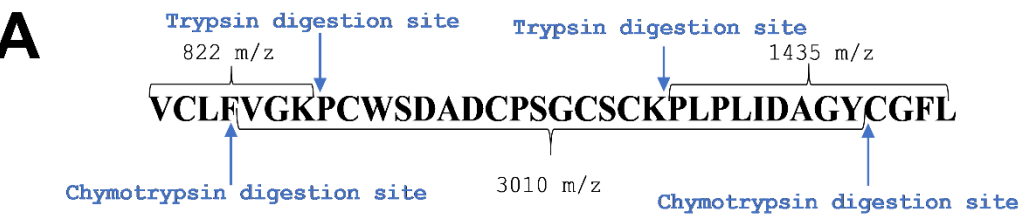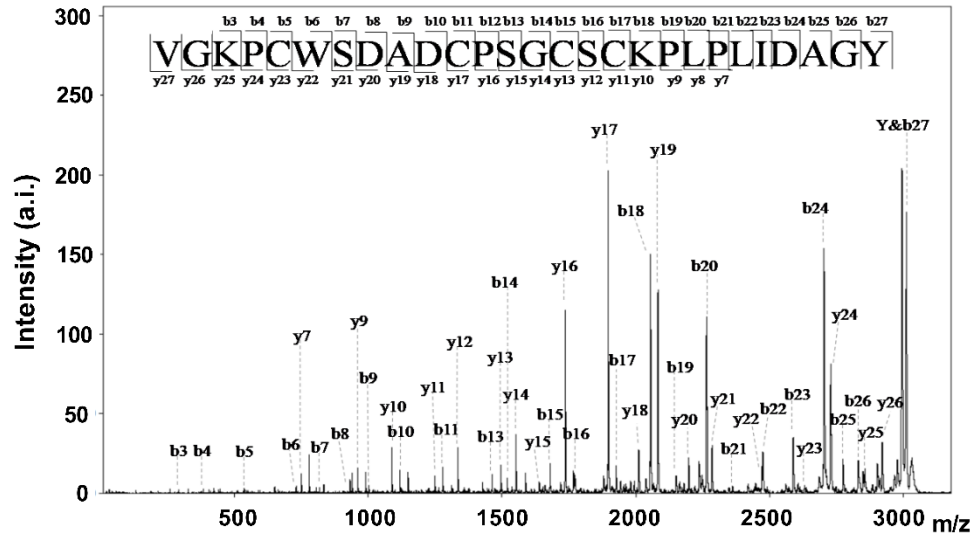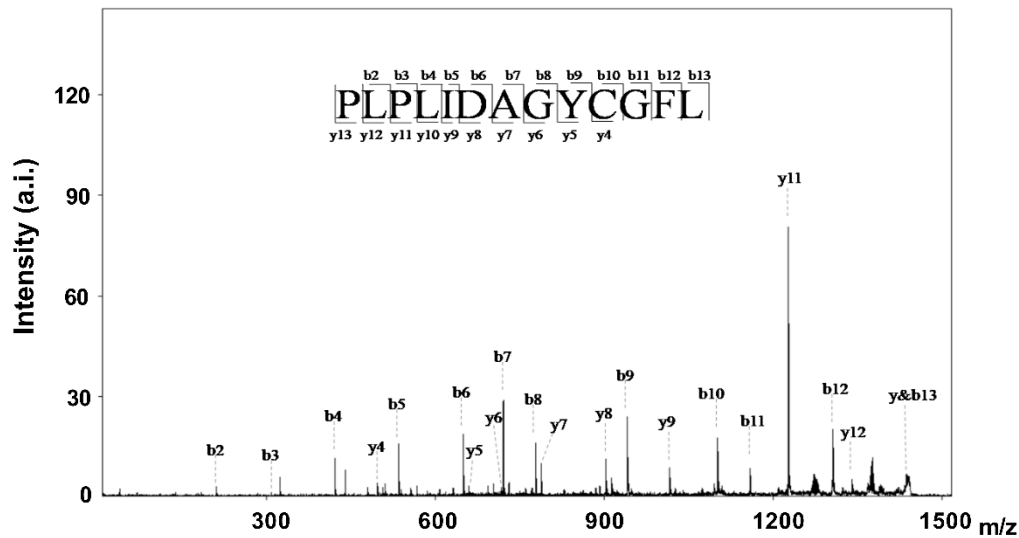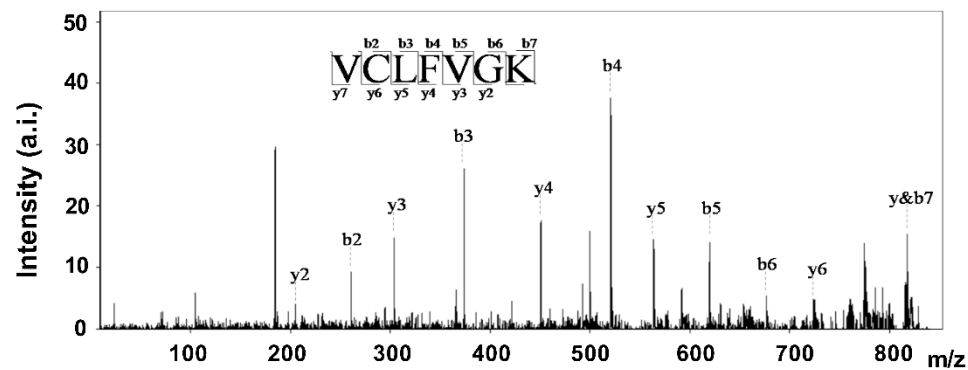

| #  | b      | Seq. | y      | #(+1) |
|----|--------|------|--------|-------|
| 1  | -      | V    | 3010.2 | 27    |
| 2  | -      | G    | 2911.1 | 26    |
| 3  | 285.1  | K    | 2854.1 | 25    |
| 4  | 382.2  | P    | 2726.0 | 24    |
| 5  | 542.2  | C    | 2628.9 | 23    |
| 6  | 728.3  | W    | 2468.9 | 22    |
| 7  | 815.3  | S    | 2282.9 | 21    |
| 8  | 930.3  | D    | 2195.8 | 20    |
| 9  | 1001.4 | A    | 2080.8 | 19    |
| 10 | 1116.4 | D    | 2009.8 | 18    |
| 11 | 1276.4 | C    | 1894.7 | 17    |
| 12 | 1373.5 | P    | 1734.7 | 16    |
| 13 | 1460.5 | S    | 1637.7 | 15    |
| 14 | 1517.5 | G    | 1550.6 | 14    |
| 15 | 1677.5 | C    | 1493.6 | 13    |
| 16 | 1764.6 | S    | 1333.6 | 12    |
| 17 | 1924.6 | C    | 1246.6 | 11    |
| 18 | 2052.7 | K    | 1086.6 | 10    |
| 19 | 2149.7 | P    | 958.5  | 9     |
| 20 | 2262.8 | L    | 861.4  | 8     |
| 21 | 2359.9 | P    | 748.3  | 7     |
| 22 | 2472.9 | L    | -      | 6     |
| 23 | 2586.0 | I    | -      | 5     |
| 24 | 2701.1 | D    | -      | 4     |
| 25 | 2772.1 | A    | -      | 3     |
| 26 | 2829.1 | G    | -      | 2     |
| 27 | 3010.2 | Y    | -      | 1     |

| #  | b      | Seq. | y      | #(+1) |
|----|--------|------|--------|-------|
| 1  | -      | P    | 1435.7 | 13    |
| 2  | 211.1  | L    | 1338.6 | 12    |
| 3  | 308.1  | P    | 1225.5 | 11    |
| 4  | 421.2  | L    | 1128.5 | 10    |
| 5  | 534.3  | I    | 1015.4 | 9     |
| 6  | 649.3  | D    | 902.3  | 8     |
| 7  | 720.4  | A    | 787.3  | 7     |
| 8  | 777.4  | G    | 716.2  | 6     |
| 9  | 940.5  | Y    | 659.2  | 5     |
| 10 | 1100.5 | C    | 496.2  | 4     |
| 11 | 1157.5 | G    | -      | 3     |
| 12 | 1304.6 | F    | -      | 2     |
| 13 | 1417.6 | L    | -      | 1     |

| # | b     | Seq. | y     | #(+1) |
|---|-------|------|-------|-------|
| 1 | -     | V    | 822.4 | 7     |
| 2 | 260.0 | C    | 723.3 | 6     |
| 3 | 373.1 | L    | 563.3 | 5     |
| 4 | 520.2 | F    | 450.2 | 4     |
| 5 | 619.3 | V    | 303.2 | 3     |
| 6 | 676.3 | G    | 204.1 | 2     |
| 7 | 804.4 | K    | -     | 1     |

B

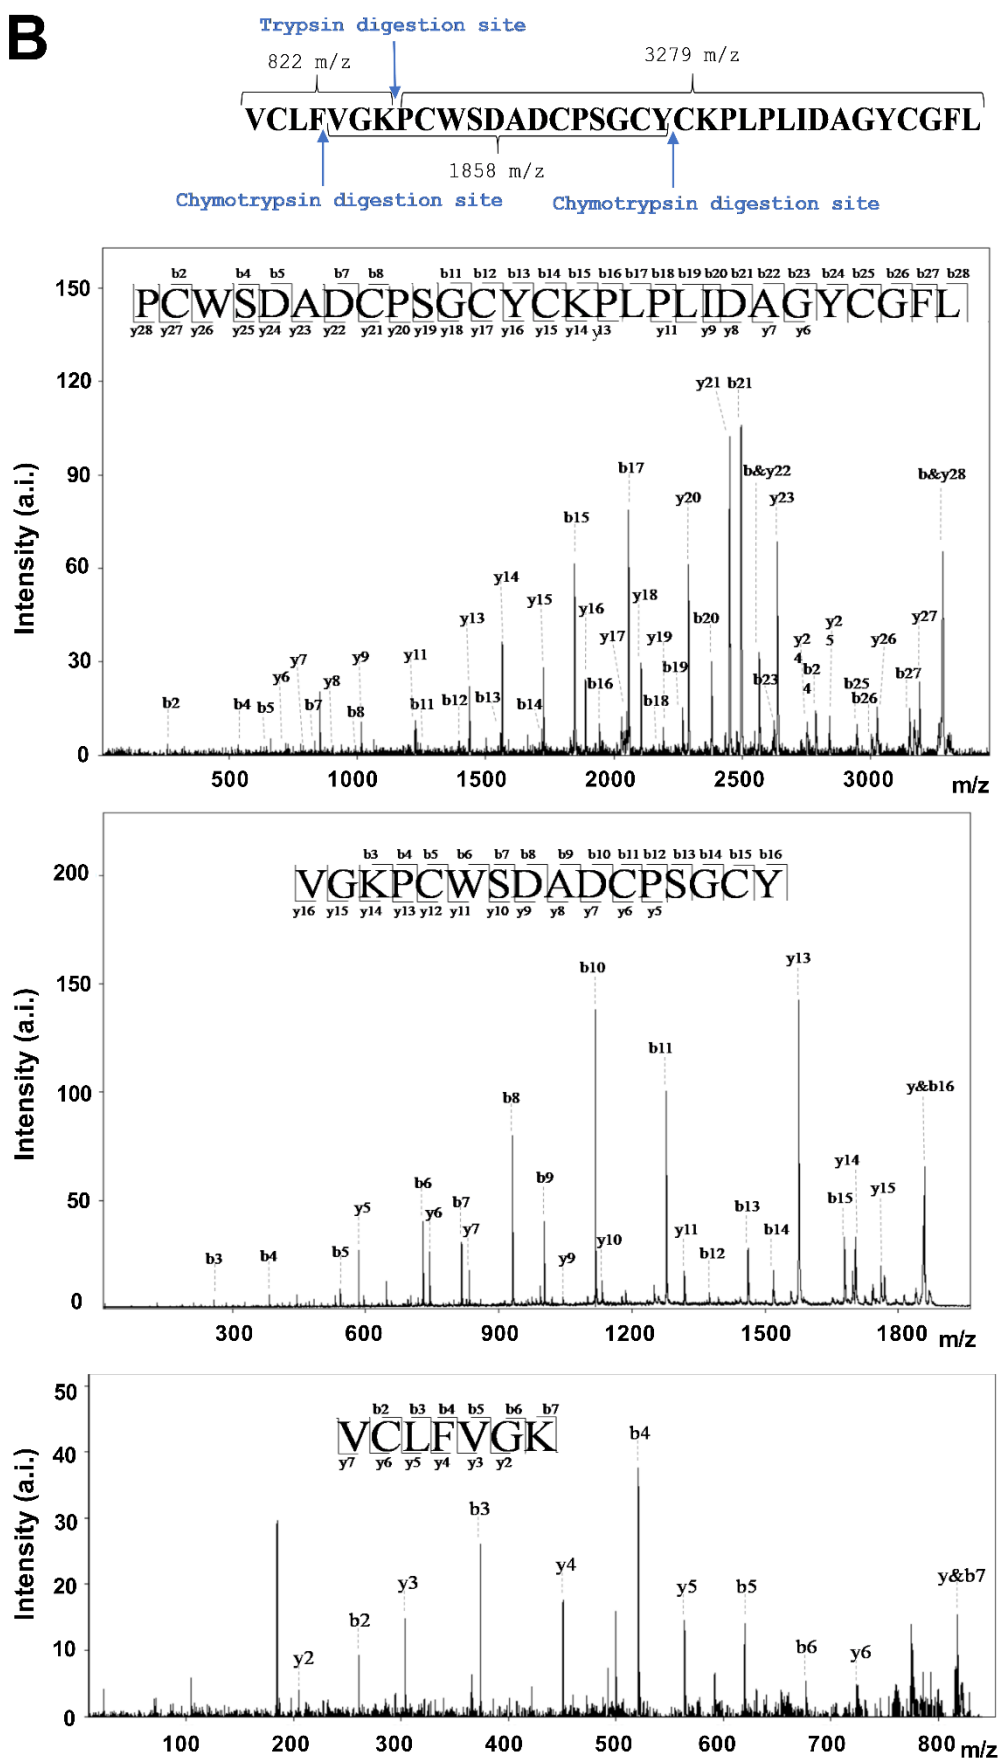

| #  | b      | Seq. | y      | #(+1) |
|----|--------|------|--------|-------|
| 1  | -      | P    | 3279.2 | 28    |
| 2  | 258.0  | C    | 3182.2 | 27    |
| 3  | -      | W    | 3022.2 | 26    |
| 4  | 531.1  | S    | 2836.1 | 25    |
| 5  | 646.2  | D    | 2749.0 | 24    |
| 6  | -      | A    | 2634.0 | 23    |
| 7  | 832.2  | D    | 2563.0 | 22    |
| 8  | 992.2  | C    | 2447.9 | 21    |
| 9  | -      | P    | 2287.9 | 20    |
| 10 | -      | S    | 2190.9 | 19    |
| 11 | 1233.7 | G    | 2103.9 | 18    |
| 12 | 1393.3 | C    | 2046.8 | 17    |
| 13 | 1556.4 | Y    | 1886.8 | 16    |
| 14 | 1716.4 | C    | 1723.8 | 15    |
| 15 | 1844.5 | K    | 1563.8 | 14    |
| 16 | 1941.6 | P    | 1435.7 | 13    |
| 17 | 2054.7 | L    | -      | 12    |
| 18 | 2151.7 | P    | 1225.5 | 11    |
| 19 | 2264.8 | L    | -      | 10    |
| 20 | 2377.9 | I    | 1015.4 | 9     |
| 21 | 2492.9 | D    | 902.3  | 8     |
| 22 | 2563.9 | A    | 787.3  | 7     |
| 23 | 2621.0 | G    | 716.2  | 6     |
| 24 | 2784.0 | Y    | -      | 5     |
| 25 | 2944.0 | C    | -      | 4     |
| 26 | 3001.1 | G    | -      | 3     |
| 27 | 3148.1 | F    | -      | 2     |
| 28 | 3279.2 | L    | -      | 1     |

| #  | b      | Seq. | y      | #(+1) |
|----|--------|------|--------|-------|
| 1  | -      | V    | 1858.6 | 16    |
| 2  | -      | G    | 1759.5 | 15    |
| 3  | 258.1  | K    | 1702.5 | 14    |
| 4  | 382.2  | P    | 1574.4 | 13    |
| 5  | 542.2  | C    | 1477.4 | 12    |
| 6  | 728.3  | W    | 1317.4 | 11    |
| 7  | 815.3  | S    | 1131.3 | 10    |
| 8  | 930.3  | D    | 1044.2 | 9     |
| 9  | 1001.4 | A    | 929.2  | 8     |
| 10 | 1116.4 | D    | 858.2  | 7     |
| 11 | 1276.4 | C    | 743.2  | 6     |
| 12 | 1373.5 | P    | 583.1  | 5     |
| 13 | 1460.5 | S    | -      | 4     |
| 14 | 1517.5 | G    | -      | 3     |
| 15 | 1677.5 | C    | -      | 2     |
| 16 | 1840.6 | Y    | -      | 1     |

| # | b     | Seq. | y     | #(+1) |
|---|-------|------|-------|-------|
| 1 | -     | V    | 822.4 | 7     |
| 2 | 260.0 | C    | 723.3 | 6     |
| 3 | 373.1 | L    | 563.3 | 5     |
| 4 | 520.2 | F    | 450.2 | 4     |
| 5 | 619.3 | V    | 303.2 | 3     |
| 6 | 676.3 | G    | 204.1 | 2     |
| 7 | 804.4 | K    | -     | 1     |

C

Chymotrypsin digestion site

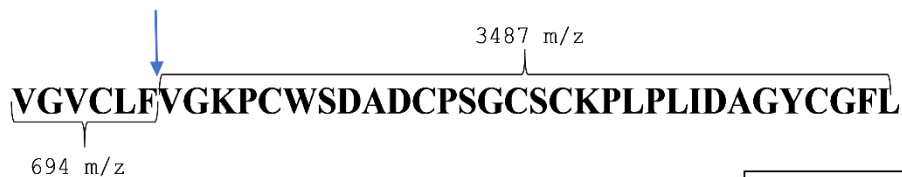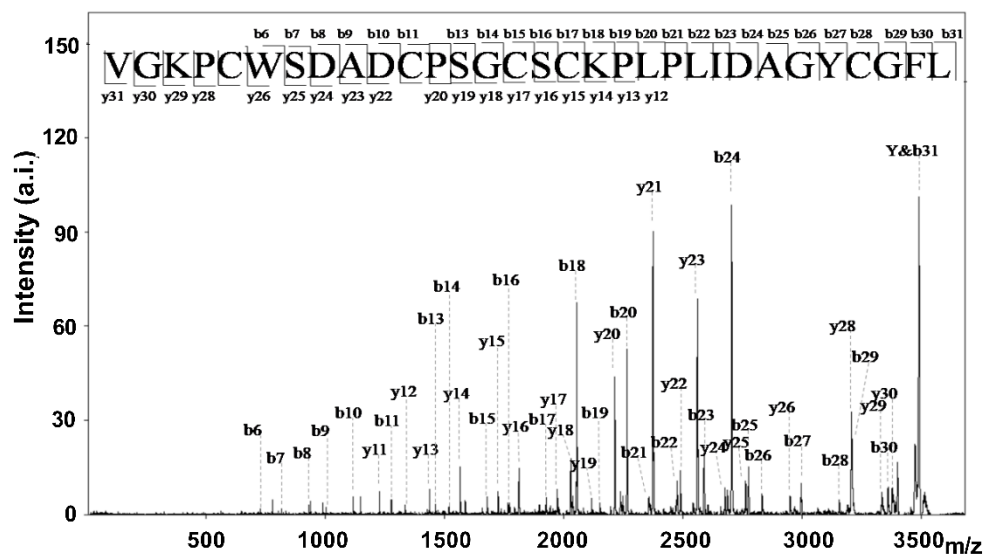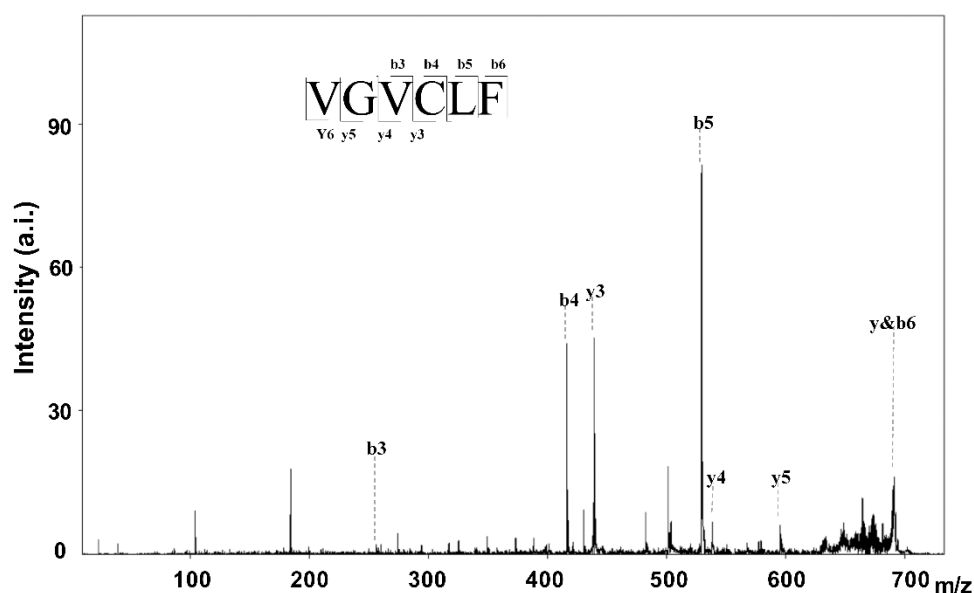

| #  | b      | Seq. | y      | #(+1) |
|----|--------|------|--------|-------|
| 1  | -      | V    | 3487.4 | 31    |
| 2  | -      | G    | 3388.3 | 30    |
| 3  | -      | K    | 3331.3 | 29    |
| 4  | -      | P    | 3203.2 | 28    |
| 5  | -      | C    | -      | 27    |
| 6  | 728.3  | W    | 2946.1 | 26    |
| 7  | 815.3  | S    | 2760.0 | 25    |
| 8  | 930.3  | D    | 2673.0 | 24    |
| 9  | 1001.4 | A    | 2558.0 | 23    |
| 10 | 1116.4 | D    | 2486.9 | 22    |
| 11 | 1276.4 | C    | -      | 21    |
| 12 | -      | P    | 2211.9 | 20    |
| 13 | 1460.5 | S    | 2114.9 | 19    |
| 14 | 1517.5 | G    | 2027.8 | 18    |
| 15 | 1677.5 | C    | 1970.8 | 17    |
| 16 | 1764.6 | S    | 1810.8 | 16    |
| 17 | 1924.6 | C    | 1723.8 | 15    |
| 18 | 2052.7 | K    | 1563.8 | 14    |
| 19 | 2149.7 | P    | 1435.7 | 13    |
| 20 | 2262.8 | L    | 1338.6 | 12    |
| 21 | 2359.9 | P    | 1225.5 | 11    |
| 22 | 2472.9 | L    | -      | 10    |
| 23 | 2586.0 | I    | -      | 9     |
| 24 | 2701.1 | D    | -      | 8     |
| 25 | 2772.1 | A    | -      | 7     |
| 26 | 2829.1 | G    | -      | 6     |
| 27 | 2992.2 | Y    | -      | 5     |
| 28 | 3152.2 | C    | -      | 4     |
| 29 | 3209.2 | G    | -      | 3     |
| 30 | 3356.3 | F    | -      | 2     |
| 31 | 3469.4 | L    | -      | 1     |

| # | b     | Seq. | y     | #(+1) |
|---|-------|------|-------|-------|
| 1 | -     | V    | 694.3 | 6     |
| 2 | -     | G    | 595.2 | 5     |
| 3 | 256.1 | V    | 538.2 | 4     |
| 4 | 416.1 | C    | 739.1 | 3     |
| 5 | 529.2 | L    | -     | 2     |
| 6 | 676.3 | F    | -     | 1     |

**D**

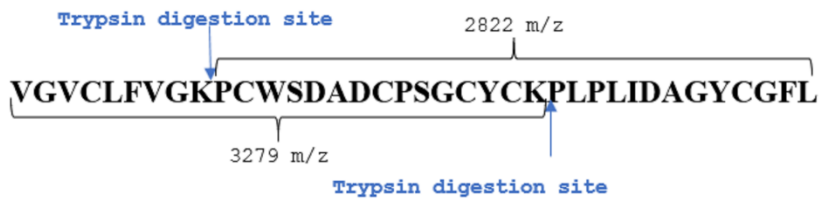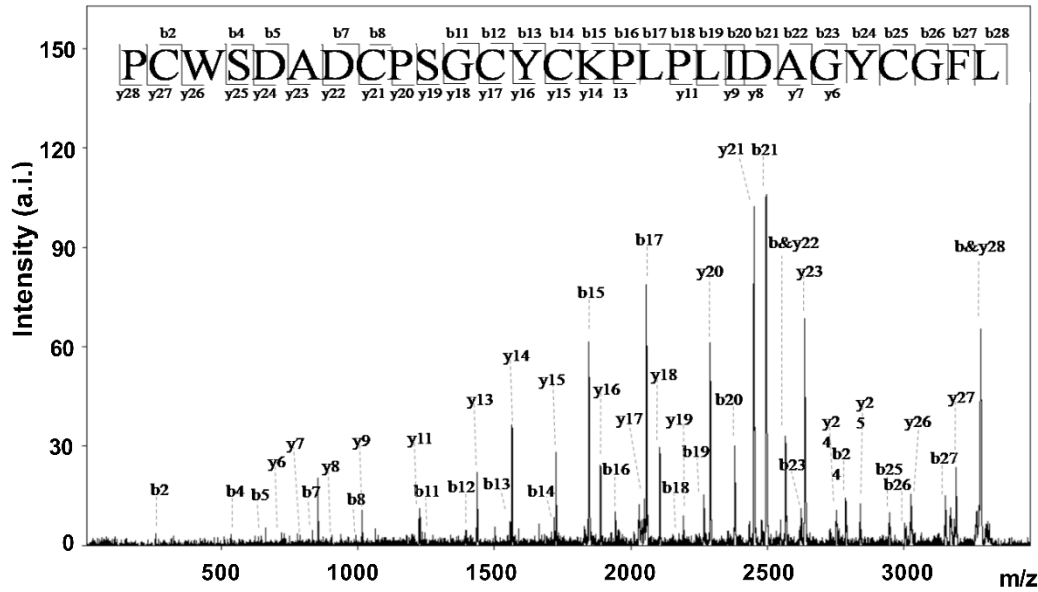

| #  | b      | Seq. | y      | #(+1) |
|----|--------|------|--------|-------|
| 1  | -      | P    | 3279.2 | 28    |
| 2  | 258.0  | C    | 3182.2 | 27    |
| 3  | -      | W    | 3022.2 | 26    |
| 4  | 531.1  | S    | 2836.1 | 25    |
| 5  | 646.2  | D    | 2749.0 | 24    |
| 6  | -      | A    | 2634.0 | 23    |
| 7  | 832.2  | D    | 2563.0 | 22    |
| 8  | 992.2  | C    | 2447.9 | 21    |
| 9  | -      | P    | 2287.9 | 20    |
| 10 | -      | S    | 2190.9 | 19    |
| 11 | 1233.7 | G    | 2103.9 | 18    |
| 12 | 1393.3 | C    | 2046.8 | 17    |
| 13 | 1556.4 | Y    | 1886.8 | 16    |
| 14 | 1716.4 | C    | 1723.8 | 15    |
| 15 | 1844.5 | K    | 1563.8 | 14    |
| 16 | 1941.6 | P    | 1435.7 | 13    |
| 17 | 2054.7 | L    | -      | 12    |
| 18 | 2151.7 | P    | 1225.5 | 11    |
| 19 | 2264.8 | L    | -      | 10    |
| 20 | 2377.9 | I    | 1015.4 | 9     |
| 21 | 2492.9 | D    | 902.3  | 8     |
| 22 | 2563.9 | A    | 787.3  | 7     |
| 23 | 2621.0 | G    | 716.2  | 6     |
| 24 | 2784.0 | Y    | -      | 5     |
| 25 | 2944.0 | C    | -      | 4     |
| 26 | 3001.1 | G    | -      | 3     |
| 27 | 3148.1 | F    | -      | 2     |
| 28 | 3279.2 | L    | -      | 1     |

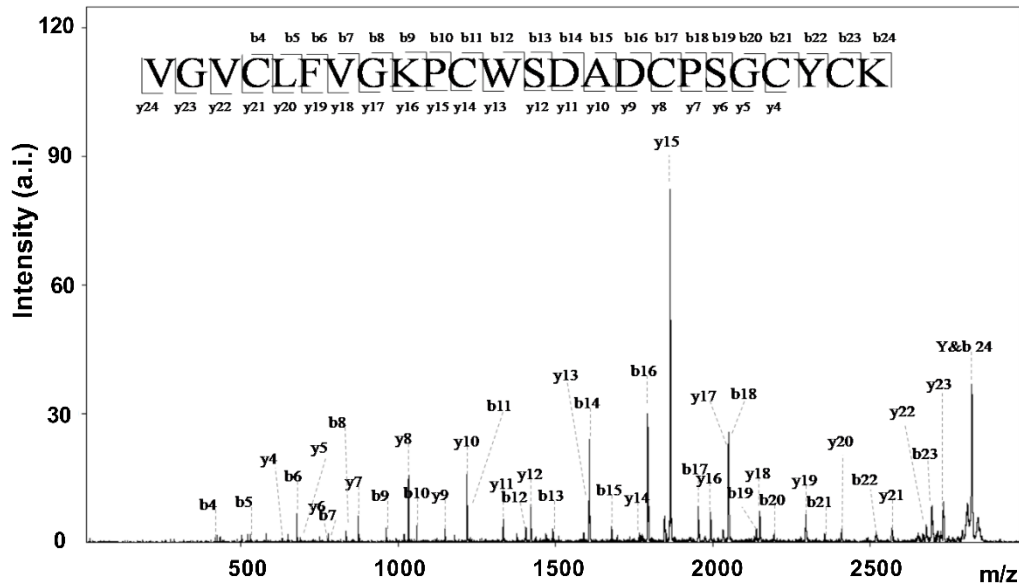

| #  | b      | Seq. | y      | #(+1) |
|----|--------|------|--------|-------|
| 1  | -      | V    | 2822.0 | 24    |
| 2  | -      | G    | 2723.0 | 23    |
| 3  | -      | V    | 2665.9 | 22    |
| 4  | 416.1  | C    | 2566.9 | 21    |
| 5  | 529.2  | L    | 2406.9 | 20    |
| 6  | 676.3  | F    | 2293.8 | 19    |
| 7  | 775.3  | V    | 2146.7 | 18    |
| 8  | 832.4  | G    | 2047.6 | 17    |
| 9  | 960.5  | K    | 1990.6 | 16    |
| 10 | 1057.5 | P    | 1862.5 | 15    |
| 11 | 1217.5 | C    | 1765.5 | 14    |
| 12 | 1403.6 | W    | 1605.5 | 13    |
| 13 | 1490.6 | S    | 1419.4 | 12    |
| 14 | 1605.7 | D    | 1332.4 | 11    |
| 15 | 1676.7 | A    | 1217.3 | 10    |
| 16 | 1791.7 | D    | 1146.3 | 9     |
| 17 | 1951.7 | C    | 1031.3 | 8     |
| 18 | 2048.8 | P    | 871.3  | 7     |
| 19 | 2135.8 | S    | 774.2  | 6     |
| 20 | 2192.8 | G    | 687.2  | 5     |
| 21 | 2352.9 | C    | 630.1  | 4     |
| 22 | 2515.9 | Y    | -      | 3     |
| 23 | 2675.9 | C    | -      | 2     |
| 24 | 2804.0 | K    | -      | 1     |



E

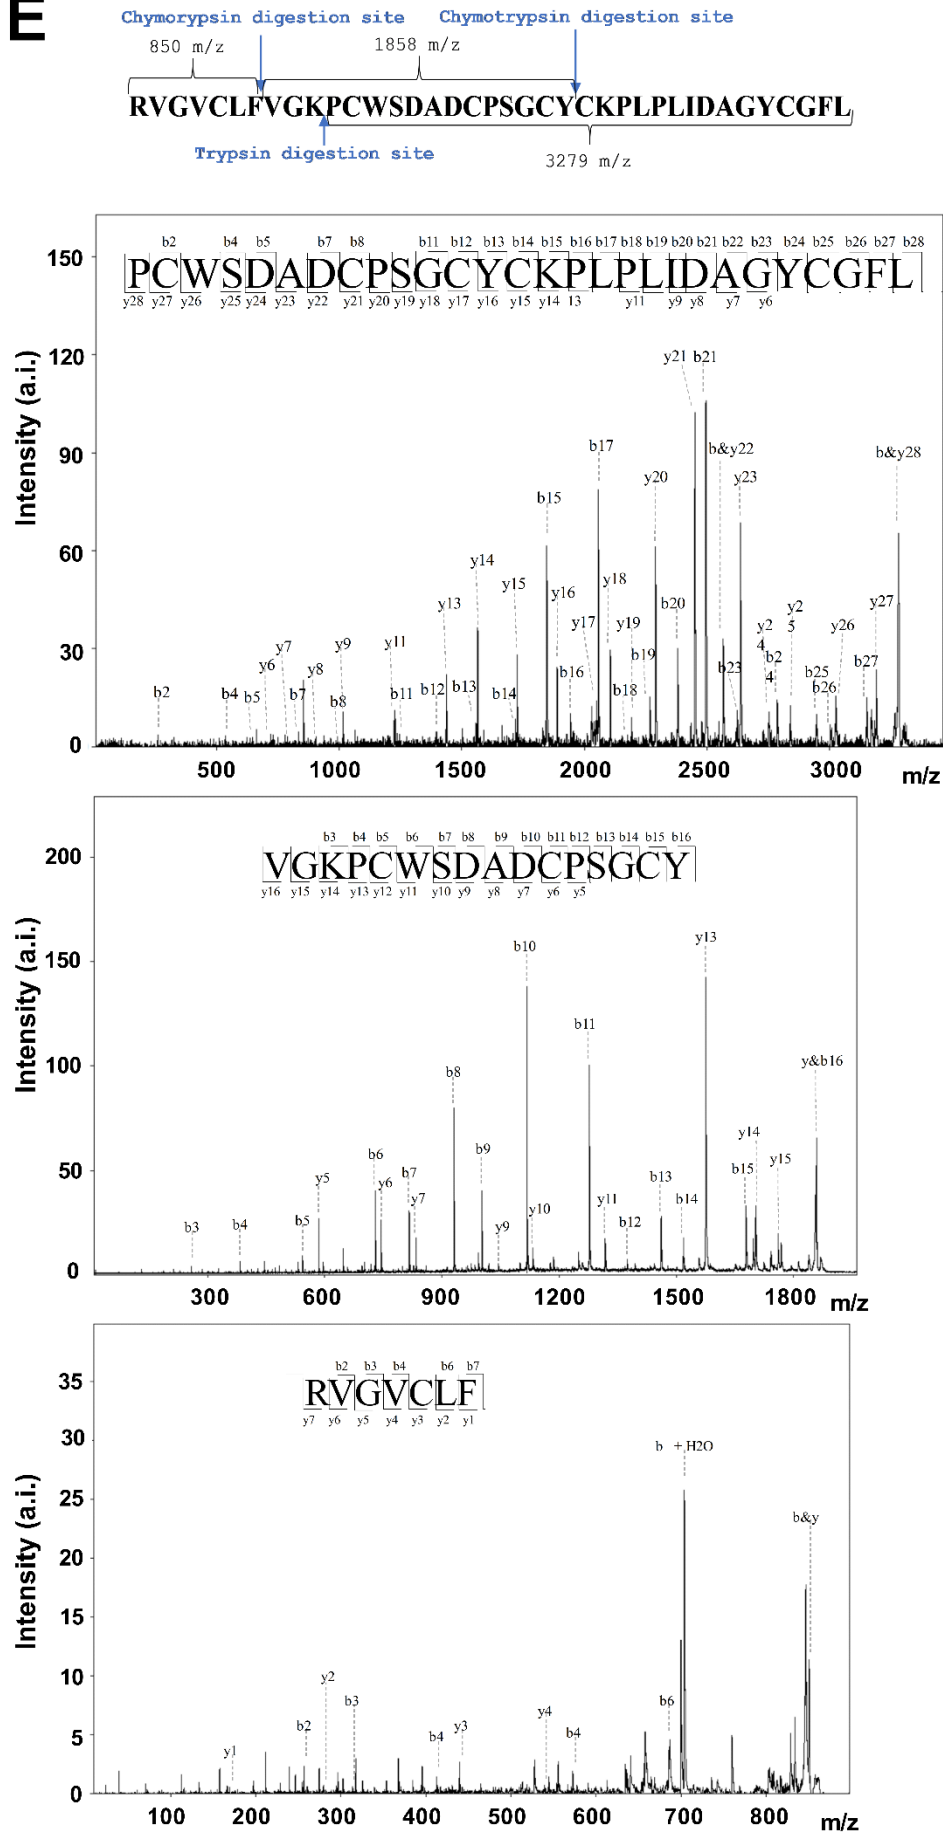

| #  | b      | Seq. | y      | #(+1) |
|----|--------|------|--------|-------|
| 1  | -      | P    | 3279.2 | 28    |
| 2  | 258.0  | C    | 3182.2 | 27    |
| 3  | -      | W    | 3022.2 | 26    |
| 4  | 531.1  | S    | 2836.1 | 25    |
| 5  | 646.2  | D    | 2749.0 | 24    |
| 6  | -      | A    | 2634.0 | 23    |
| 7  | 832.2  | D    | 2563.0 | 22    |
| 8  | 992.2  | C    | 2447.9 | 21    |
| 9  | -      | P    | 2287.9 | 20    |
| 10 | -      | S    | 2190.9 | 19    |
| 11 | 1233.7 | G    | 2103.9 | 18    |
| 12 | 1393.3 | C    | 2046.8 | 17    |
| 13 | 1556.4 | Y    | 1886.8 | 16    |
| 14 | 1716.4 | C    | 1723.8 | 15    |
| 15 | 1844.5 | K    | 1563.8 | 14    |
| 16 | 1941.6 | P    | 1435.7 | 13    |
| 17 | 2054.7 | L    | -      | 12    |
| 18 | 2151.7 | P    | 1225.5 | 11    |
| 19 | 2264.8 | L    | -      | 10    |
| 20 | 2377.9 | I    | 1015.4 | 9     |
| 21 | 2492.9 | D    | 902.3  | 8     |
| 22 | 2563.9 | A    | 787.3  | 7     |
| 23 | 2621.0 | G    | 716.2  | 6     |
| 24 | 2784.0 | Y    | -      | 5     |
| 25 | 2944.0 | C    | -      | 4     |
| 26 | 3001.1 | G    | -      | 3     |
| 27 | 3148.1 | F    | -      | 2     |
| 28 | 3279.2 | L    | -      | 1     |

| #  | b        | Seq. | y        | #(+1) |
|----|----------|------|----------|-------|
| 1  | -        | V    | 1858.654 | 16    |
| 2  | -        | G    | 1759.586 | 15    |
| 3  | 258.192  | K    | 1702.565 | 14    |
| 4  | 382.24   | P    | 1574.470 | 13    |
| 5  | 542.254  | C    | 1477.417 | 12    |
| 6  | 728.333  | W    | 1317.408 | 11    |
| 7  | 815.365  | S    | 1131.328 | 10    |
| 8  | 930.392  | D    | 1044.296 | 9     |
| 9  | 1001.429 | A    | 929.269  | 8     |
| 10 | 1116.456 | D    | 858.2327 | 7     |
| 11 | 1276.465 | C    | 743.205  | 6     |
| 12 | 1373.518 | P    | 583.196  | 5     |
| 13 | 1460.550 | S    | -        | 4     |
| 14 | 1517.571 | G    | -        | 3     |
| 15 | 1677.581 | C    | -        | 2     |
| 16 | 1840.644 | Y    | -        | 1     |

| # | b     | Seq. | y     | #(+1) |
|---|-------|------|-------|-------|
| 1 | -     | R    | 850.4 | 7     |
| 2 | 256.1 | V    | 694.3 | 6     |
| 3 | 313.1 | G    | 595.2 | 5     |
| 4 | 412.2 | V    | 538.2 | 4     |
| 5 | -     | C    | 439.1 | 3     |
| 6 | 685.3 | L    | 279.1 | 2     |
| 7 | 850.4 | F    | 166.0 | 1     |



G

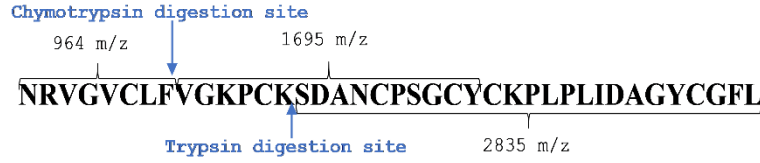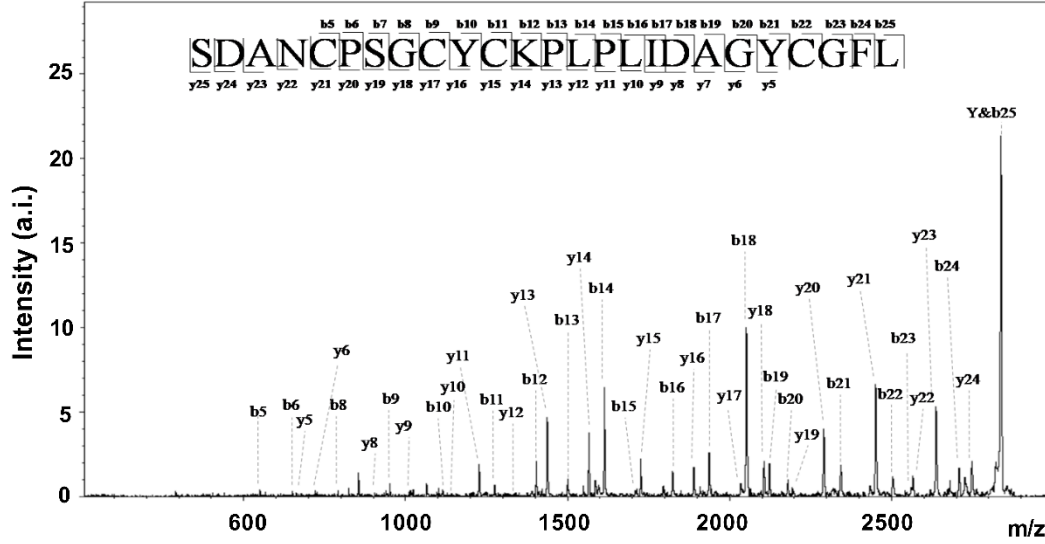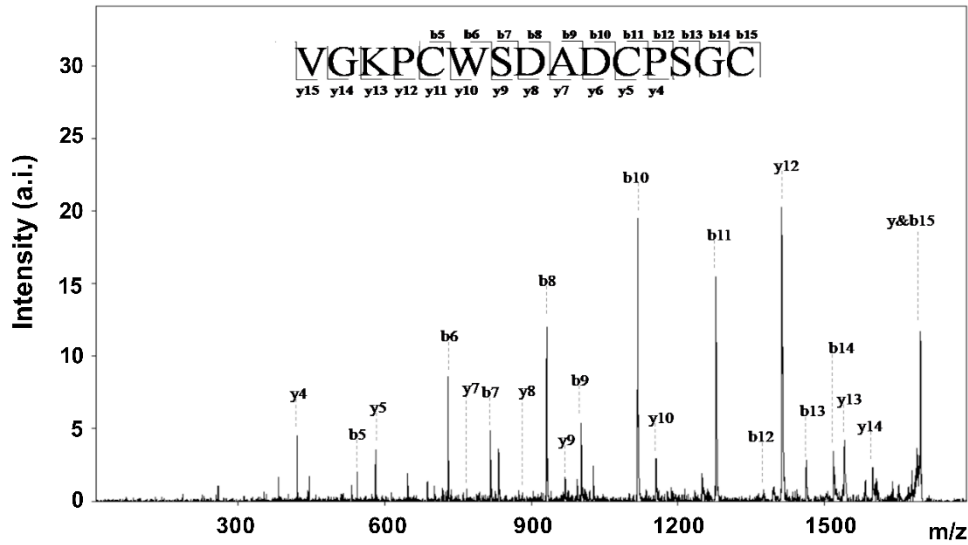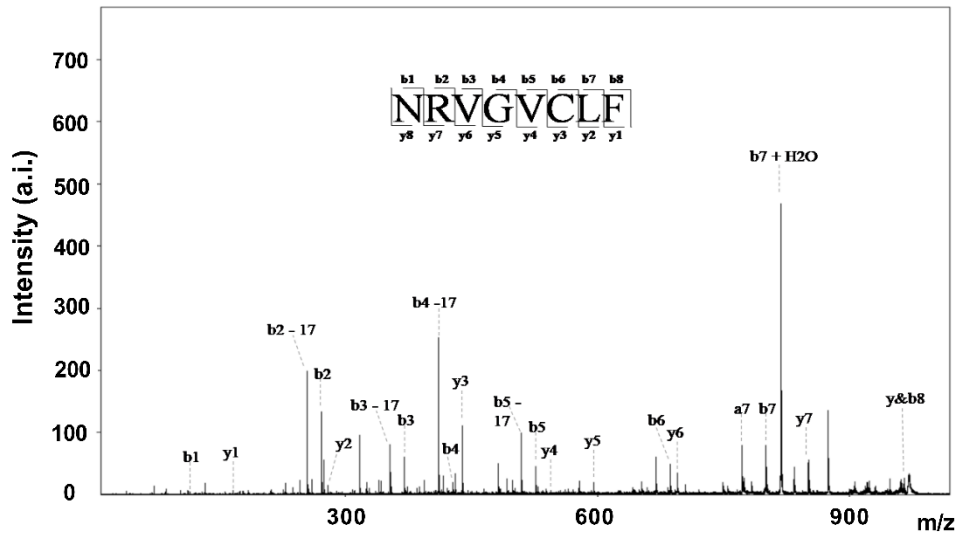

| #  | b      | Seq. | y      | #(+1) |
|----|--------|------|--------|-------|
| 1  | -      | S    | 2835.1 | 25    |
| 2  | -      | D    | 2748.1 | 24    |
| 3  | -      | A    | 2633.0 | 23    |
| 4  | -      | D    | 2562.0 | 22    |
| 5  | 549.1  | C    | 2447.0 | 21    |
| 6  | 646.1  | P    | 2287.0 | 20    |
| 7  | 733.2  | S    | 2189.9 | 19    |
| 8  | 790.2  | G    | 2102.9 | 18    |
| 9  | 950.2  | C    | 2045.9 | 17    |
| 10 | 1113.3 | Y    | 1885.8 | 16    |
| 11 | 1273.3 | C    | 1722.8 | 15    |
| 12 | 1401.4 | K    | 1562.8 | 14    |
| 13 | 1498.4 | P    | 1434.7 | 13    |
| 14 | 1611.5 | L    | 1337.6 | 12    |
| 15 | 1708.6 | P    | 1224.5 | 11    |
| 16 | 1821.6 | L    | 1127.5 | 10    |
| 17 | 1934.7 | I    | 1014.4 | 9     |
| 18 | 2048.8 | N    | 901.3  | 8     |
| 19 | 2119.8 | A    | 787.3  | 7     |
| 20 | 2176.8 | G    | 716.2  | 6     |
| 21 | 2339.9 | Y    | 659.2  | 5     |
| 22 | 2499.9 | C    | -      | 4     |
| 23 | 2556.5 | G    | -      | 3     |
| 24 | 2704.0 | F    | -      | 2     |
| 25 | 2817.1 | L    | -      | 1     |

| #  | b      | Seq. | y      | #(+1) |
|----|--------|------|--------|-------|
| 1  | -      | V    | 1695.5 | 15    |
| 2  | -      | G    | 1596.5 | 14    |
| 3  | -      | K    | 1539.5 | 13    |
| 4  | -      | P    | 1411.4 | 12    |
| 5  | 542.2  | C    | 1314.3 | 11    |
| 6  | 728.3  | K    | 1154.3 | 10    |
| 7  | 815.3  | S    | 968.2  | 9     |
| 8  | 930.3  | D    | 881.2  | 8     |
| 9  | 1001.4 | A    | 766.2  | 7     |
| 10 | 1116.4 | N    | 695.1  | 6     |
| 11 | 1276.4 | C    | 580.1  | 5     |
| 12 | 1373.5 | P    | 420.1  | 4     |
| 13 | 1460.5 | S    | -      | 3     |
| 14 | 1517.5 | G    | -      | 2     |
| 15 | 1677.5 | C    | -      | 1     |

| # | b       | Seq. | y       | #(+1) |
|---|---------|------|---------|-------|
| 1 | 115.050 | N    | 964.481 | 8     |
| 2 | 271.151 | R    | 850.438 | 7     |
| 3 | 370.219 | V    | 694.337 | 6     |
| 4 | 427.241 | G    | 595.269 | 5     |
| 5 | 526.309 | V    | 538.247 | 4     |
| 6 | 686.318 | C    | 439.179 | 3     |
| 7 | 799.402 | L    | 279.170 | 2     |
| 8 | 946.471 | F    | 166.086 | 1     |

H

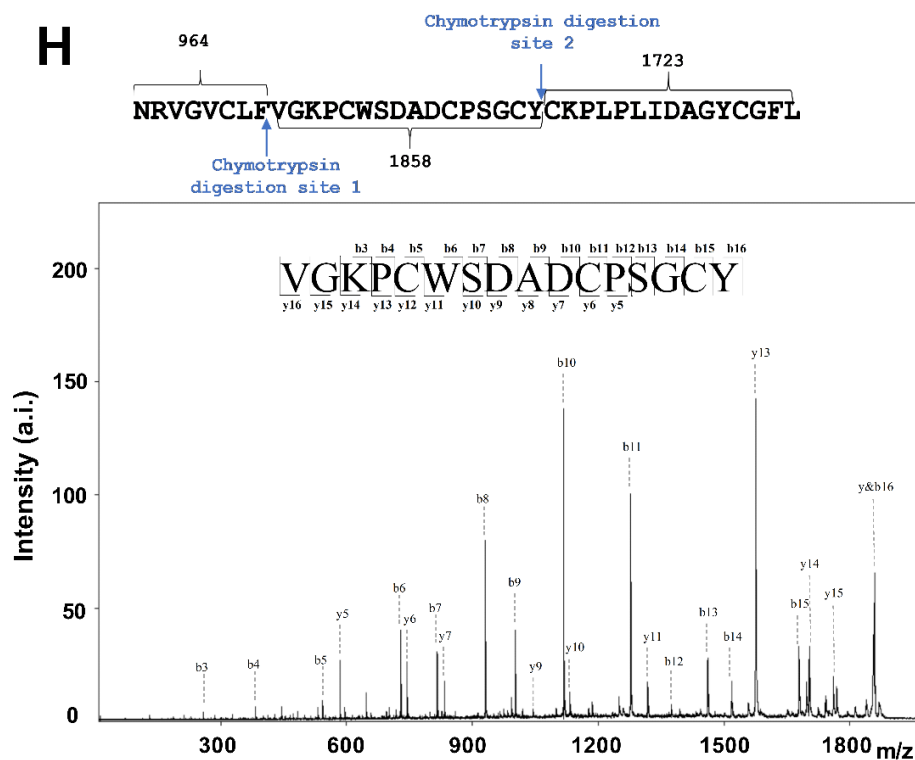

| #  | b        | Seq. | y        | #(+1) |
|----|----------|------|----------|-------|
| 1  | -        | V    | 1858.654 | 16    |
| 2  | -        | G    | 1759.586 | 15    |
| 3  | 258.192  | K    | 1702.565 | 14    |
| 4  | 382.24   | P    | 1574.470 | 13    |
| 5  | 542.254  | C    | 1477.417 | 12    |
| 6  | 728.333  | W    | 1317.408 | 11    |
| 7  | 815.365  | S    | 1131.328 | 10    |
| 8  | 930.392  | D    | 1044.296 | 9     |
| 9  | 1001.429 | A    | 929.269  | 8     |
| 10 | 1116.456 | D    | 858.2327 | 7     |
| 11 | 1276.465 | C    | 743.205  | 6     |
| 12 | 1373.518 | P    | 583.196  | 5     |
| 13 | 1460.550 | S    | -        | 4     |
| 14 | 1517.571 | G    | -        | 3     |
| 15 | 1677.581 | C    | -        | 2     |
| 16 | 1840.644 | Y    | -        | 1     |

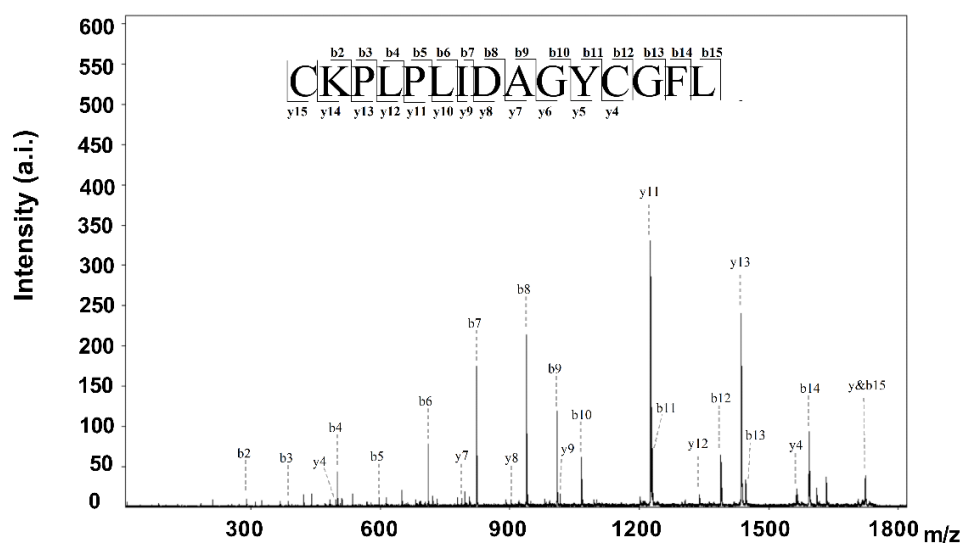

| #  | b      | Seq. | y      | #(+1) |
|----|--------|------|--------|-------|
| 1  | -      | C    | 1723.8 | 15    |
| 2  | 289.1  | K    | 1563.8 | 14    |
| 3  | 386.1  | P    | 1435.7 | 13    |
| 4  | 499.2  | L    | 1338.6 | 12    |
| 5  | 596.3  | P    | 1225.5 | 11    |
| 6  | 709.3  | L    | 1128.5 | 10    |
| 7  | 822.4  | I    | 1015.4 | 9     |
| 8  | 937.4  | D    | 902.3  | 8     |
| 9  | 1008.5 | A    | 787.3  | 7     |
| 10 | 1065.5 | G    | 716.2  | 6     |
| 11 | 1228.6 | Y    | 659.2  | 5     |
| 12 | 1388.6 | C    | 496.2  | 4     |
| 13 | 1445.6 | G    | -      | 3     |
| 14 | 1592.7 | F    | -      | 2     |
| 15 | 1705.8 | L    | -      | 1     |

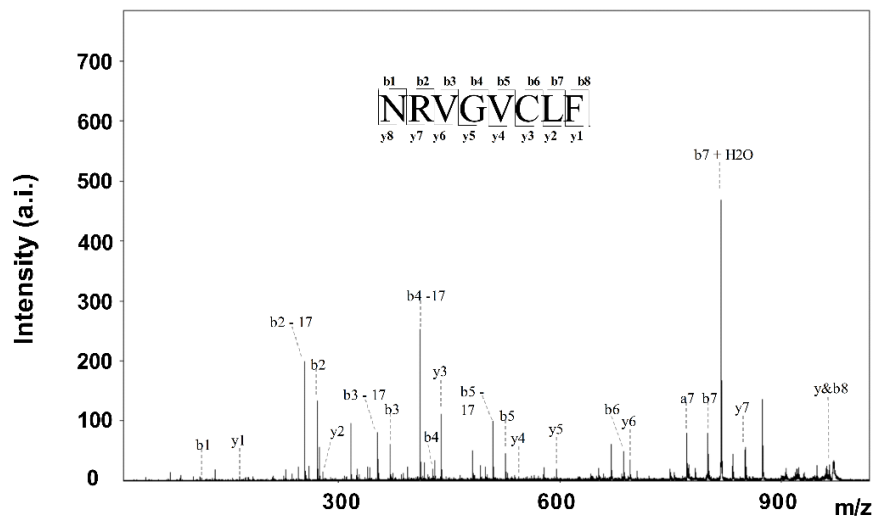

| # | b       | Seq. | y       | #(+1) |
|---|---------|------|---------|-------|
| 1 | 115.050 | N    | 964.481 | 8     |
| 2 | 271.151 | R    | 850.438 | 7     |
| 3 | 370.219 | V    | 694.337 | 6     |
| 4 | 427.241 | G    | 595.269 | 5     |
| 5 | 526.309 | V    | 538.247 | 4     |
| 6 | 686.318 | C    | 439.179 | 3     |
| 7 | 799.402 | L    | 279.170 | 2     |
| 8 | 946.471 | F    | 166.086 | 1     |

**Figure S3. Enzyme inhibition assays of citcol peptides (200  $\mu$ M each).** (A) Inhibitory activity of selected citcol peptides (1, 2, 7 and 8) against  $\alpha$ -amylase enzyme of porcine (*Sus scrofa*), fungi (*Aspergillus oryzae*) and bacteria (*Bacillus subtilis*). (B, C) Inhibitory activity of citcol peptides against  $\alpha$ -chymotrypsin (B) and trypsin (C) enzymes. Negative controls (-ve) without peptide or inhibitor (100% enzyme activity) and positive controls (+ve) with known inhibitors (complete inhibition of activity) acarbose for  $\alpha$ -amylase, PMSF for  $\alpha$ -chymotrypsin and sun-flower trypsin inhibitor (SFTI) for trypsin, respectively, were tested. All the assays were carried out in three replicates and are illustrated as percentage of inhibition (mean $\pm$ STDEV).

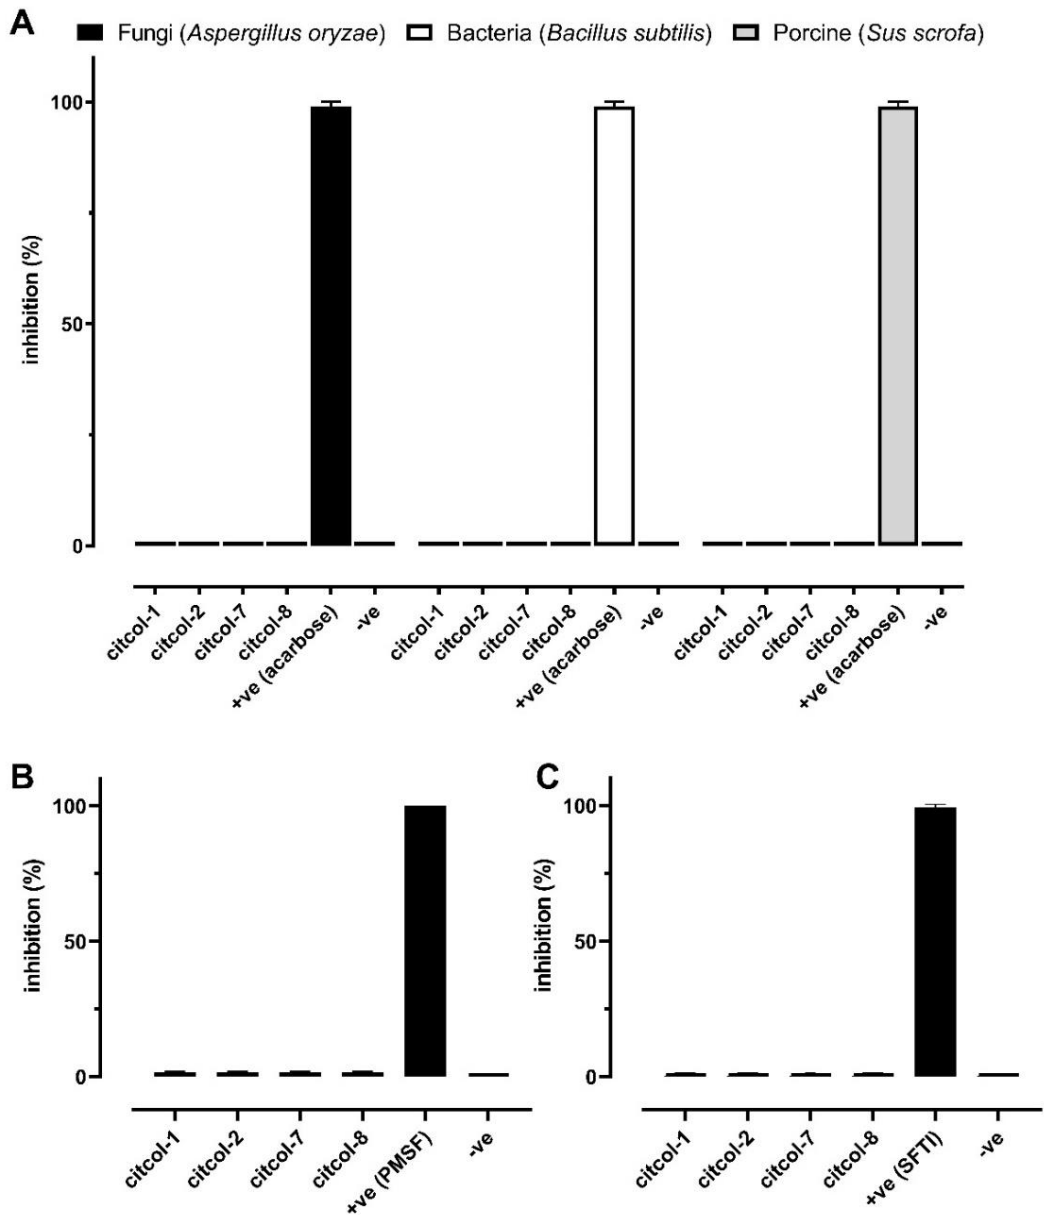

**Figure S4. Comparison of active site amino acid in squash family trypsin inhibitory CRPs from Cucurbitaceae** (*Momordica spp.*, *Citrullus lanatus*, *Bryonia dioica* and *Cucumis spp.*). Multiple sequence alignment logo generated by using web-based WebLogo application based on online Multiple Sequence Comparison by Log-EXpectation (MUSCLE) tool aligned sequences. The height of each individual residue indicates the relative frequency (in bits) of the residue in that position (as a measure of conservation). The critical amino acids (R and K) in the active site of squash family trypsin inhibitor peptides has been indicated by an orange arrow as P<sub>1</sub> position, which is found to be essential for activity of this type of CRPs [1].

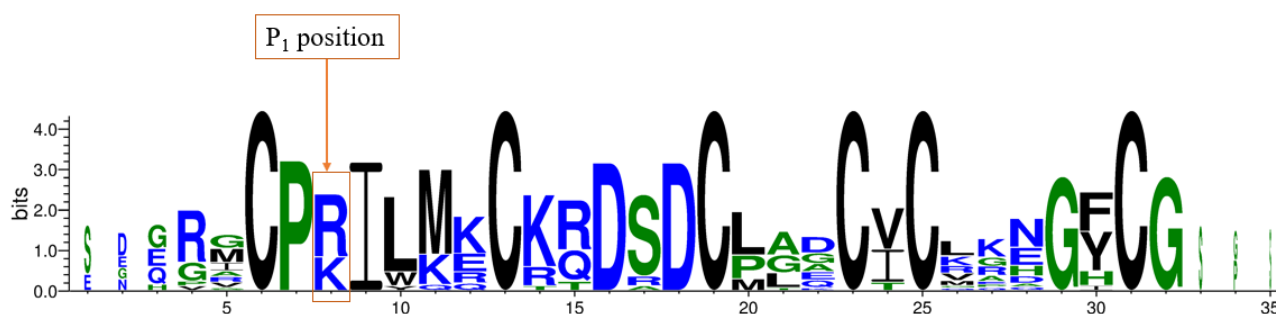

**Data 1. Overview and accession codes of genome and transcriptome data** (that were used in this study)

**Data 2. Cucurbitaceae sequences most similar to citcol peptides that were used for phylogenetic analysis** (see Figure 4)

## References

1. Krowarsch, D.; Dadlez, M.; Buczek, O.; Krokoszynska, I.; Smalas, A.O.; Otlewski, J. Interscaffolding additivity: binding of P1 variants of bovine pancreatic trypsin inhibitor to four serine proteases. *Journal of Molecular Biology* **1999**, 289, 175-186.
